# Supplementary material for: A Chromosome-Level Genome Assembly of the Non-Hematophagous Leech Whitmania pigra (Whitman 1884): Identification and Expression Analysis of Antithrombotic Genes
Source: MDPI journal article supplement (doi:10.3390/genes15020164), 2024-01-26
Supplement: s1 [file s1]

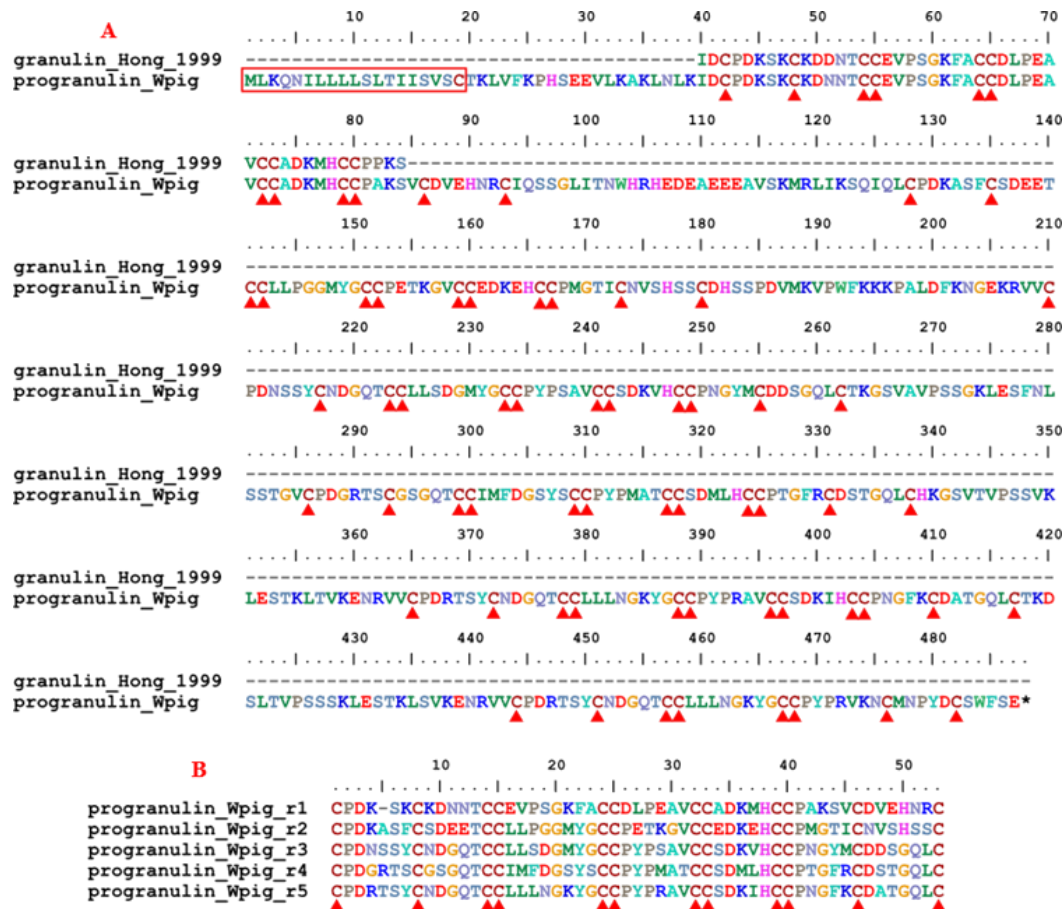

**Figure S1.** Sequence alignment of granulin and progranulin. (A) Alignment of the archetypal granulin from *Hirudo nipponia* and the progranulin identified from the *W. pigra* genome; (B) Alignment of the tandem repeats within the progranulin. Note: the archetypal granulin is a short partial segment that is located in the N-terminus of the protein.

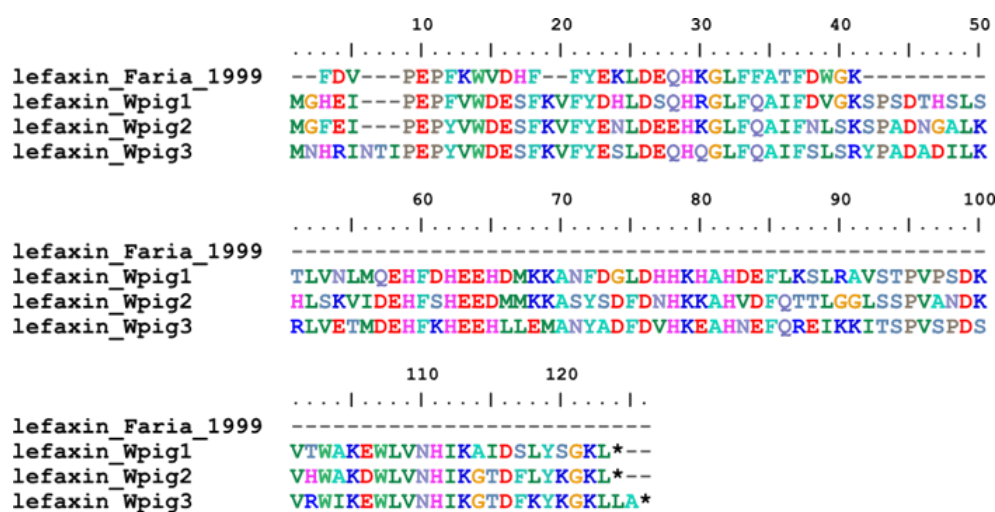

**Figure S2.** Sequence alignment of lefaxins. Alignment of the archetypal lefaxin first discovered from *Haementeria depressa* and the three lefaxins identified from the *W. pigra* genome.

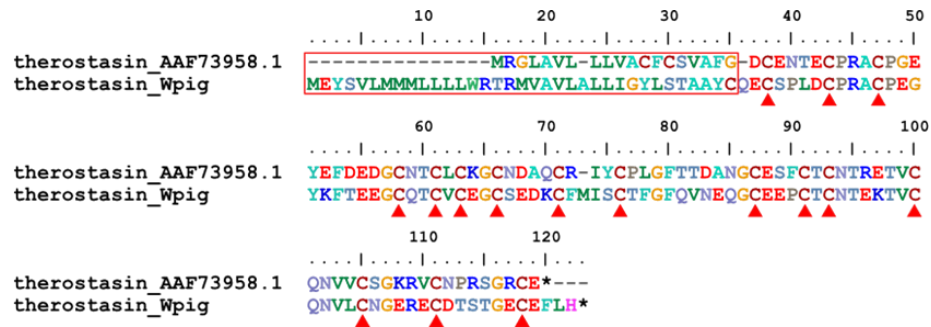

**Figure S3.** Sequence alignment therostasins. Alignment of the archetypal therostasin from *Theromyzon tessulatum* and the therostasin identified from the *W. pigra* genome.

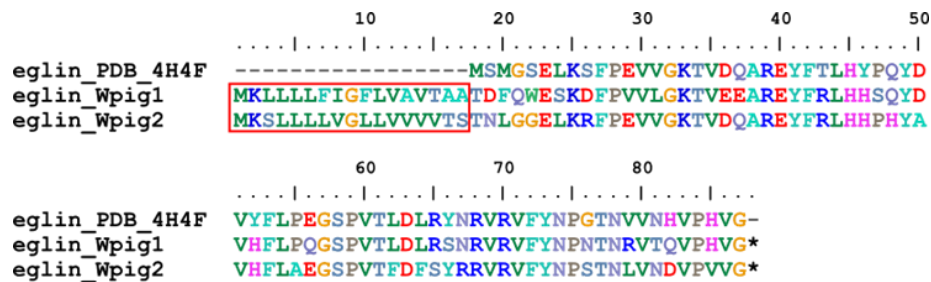

**Figure S4.** Sequence alignment of eglins. Alignment of the archetypal eglin first discovered from *H. medicinalis* and two eglins identified from the *W. pigra* genome.

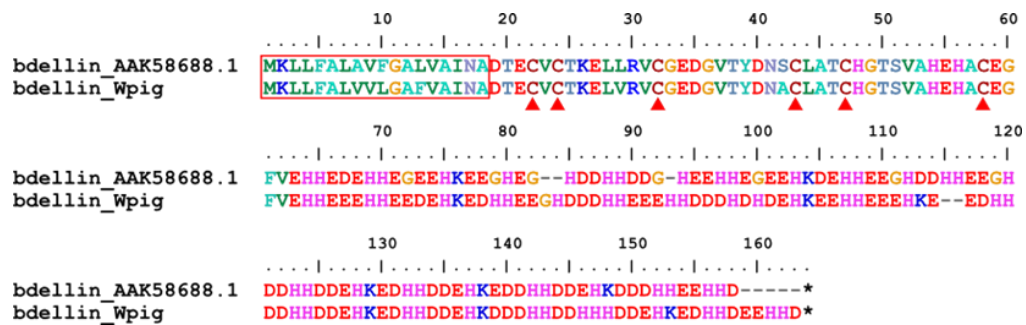

**Figure S5.** Sequence alignment of bdellins. Alignment of the archetypal bdellin from *H. medicinalis* and the bdellin from the *W. pigra* genome.

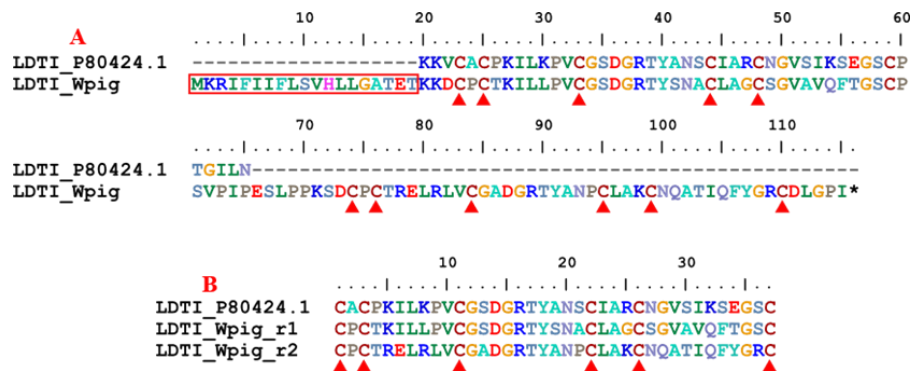

**Figure S6.** Sequence alignment of LDTIs. (A) Alignment of the LDTI from *H. medicinalis* and that from the *W. pigra* genome; (B) Alignment of the internal tandem repeats of the *W. pigra* LDTI.

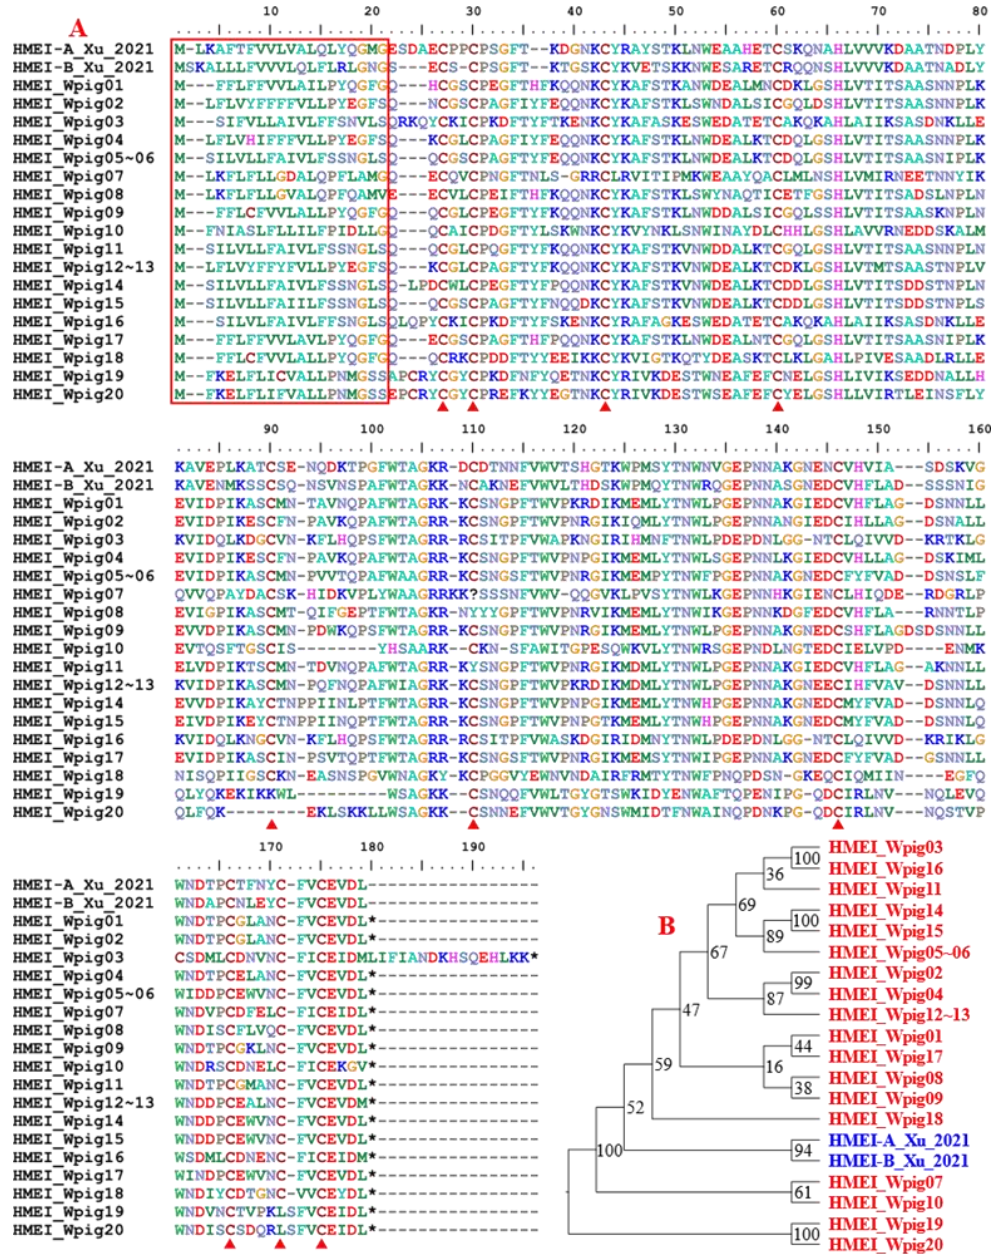

**Figure S7.** Sequence alignment and phylogenetic relationship of HMEIs. (A) Alignment of the HMEI-A and HMEI-B from *H. manillensis* and the HMEIs identified from the *W. pigra* genome; (B) phylogenetic relationships of the HMEIs.

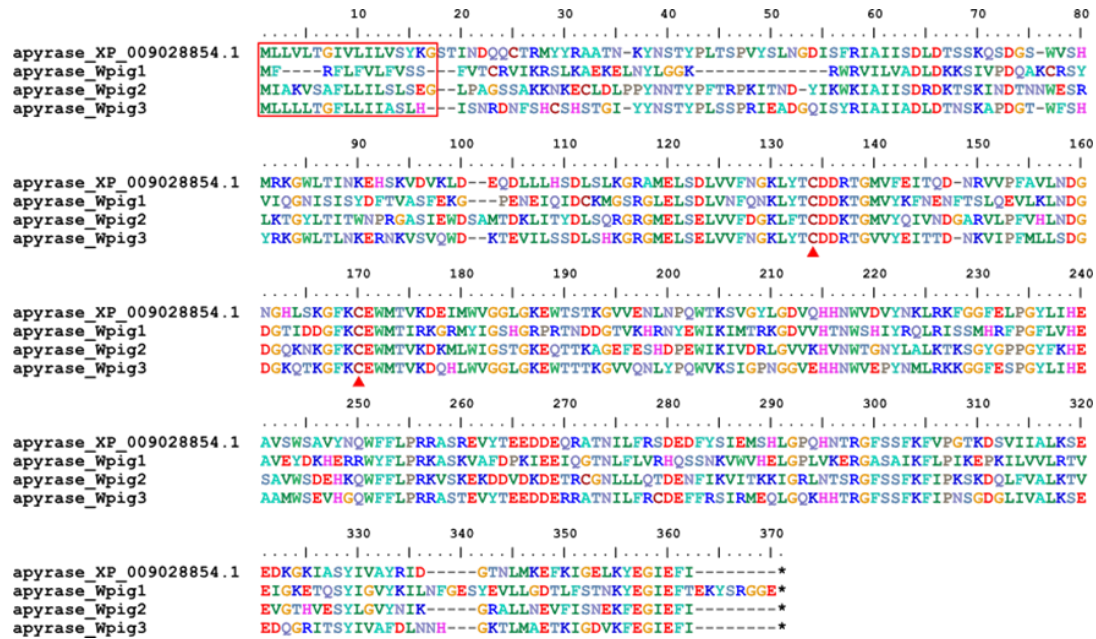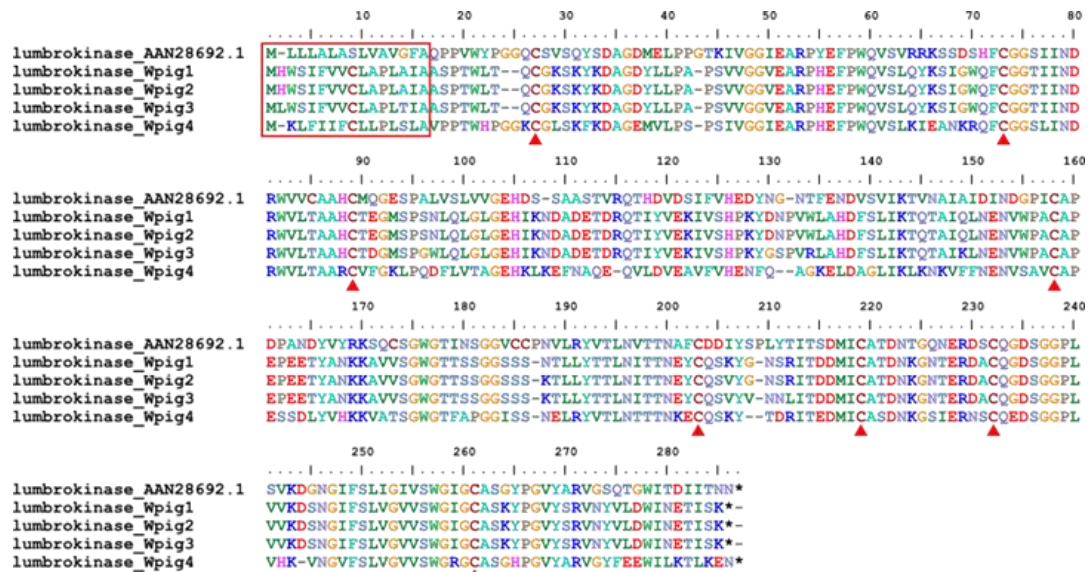

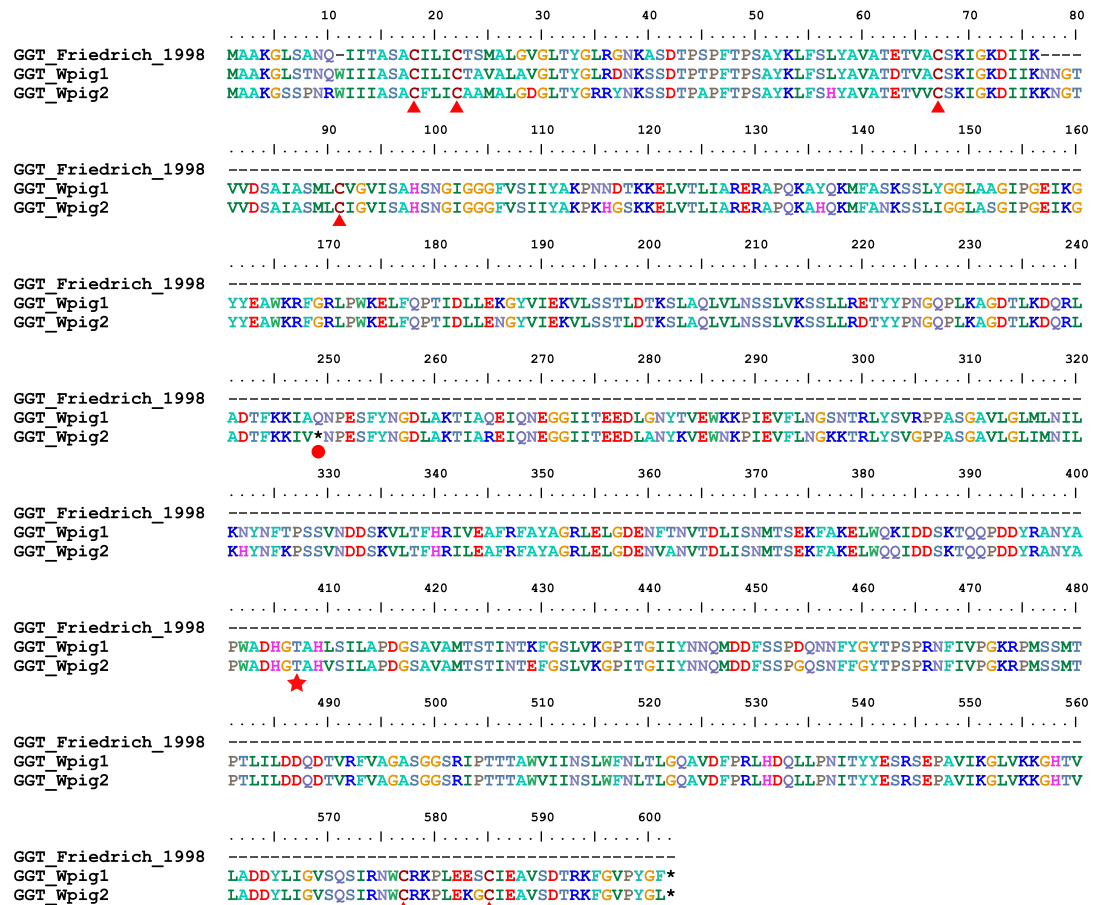

**Figure S10.** Sequence alignment of GGTs. Alignment of the archetypal GGT from *H. medicinalis* and those from *W. pigra* (the red dot shows the site of early termination; the red star shows the catalytic threonine).

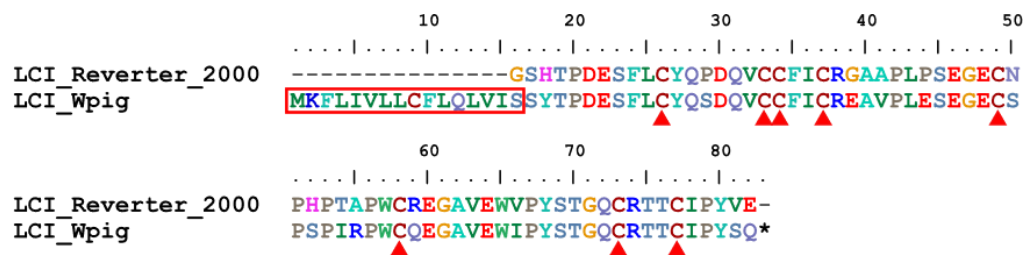

**Figure S11.** Sequence alignment of LCIs. Alignment of the archetypal LCI (from *H. medicinalis*) and the LCI identified from the *W. pigra* genome.
